# Supplementary material
Source: publisher site journal article supplement (http://www.spandidos-publications.com/6206/downloadSupplementary)
Supplement: Supplementary file 1 [file downloadSupplementary]

## Sheet: Table SI
Table SI. List of the top 30 GO terms/KEGG pathways the dysregulated genes are enriched in.
GO_ID	GO_term	TYPE	diff_gene_in_this_GO	UP_GENE	DOWN_GENE	all_diff_gene_in_all_GO	all_gene_in_this_GO	all_gene_in_all_GO	gene_UP_list	gene_DOWN_list	rich_factor	P-value	Q value
GO:0019805	quinolinate biosynthetic process	biological_process	4	3	1	1577	4	22747	ENSG00000162882(HAAO),ENSG00000115919(KYNU),ENSG00000153086(ACMSD),	ENSG00000117009(KMO),	14.4242	0.000231282	0.0120333
GO:0046874	quinolinate metabolic process	biological_process	4	3	1	1577	5	22747	ENSG00000162882(HAAO),ENSG00000153086(ACMSD),ENSG00000115919(KYNU),	ENSG00000117009(KMO),	11.5394	0.000437739	0.0185378
GO:0019464	glycine decarboxylation via glycine cleavage system	biological_process	4	4	0	1577	5	22747	ENSG00000260643(AC092718.3),ENSG00000145020(AMT),ENSG00000284512(AC092718.8),ENSG00000178445(GLDC),	-	11.5394	0.000437739	0.0185378
GO:0034354	'de novo' NAD biosynthetic process from tryptophan	biological_process	5	3	2	1577	7	22747	ENSG00000162882(HAAO),ENSG00000115919(KYNU),ENSG00000153086(ACMSD),	ENSG00000117009(KMO),ENSG00000188676(IDO2),	10.303	0.000171073	0.00949768
GO:0051459	regulation of corticotropin secretion	biological_process	4	3	1	1577	6	22747	ENSG00000157017(GHRL),ENSG00000147571(CRH),ENSG00000171388(APLN),	ENSG00000145708(CRHBP),	9.61615	0.000759526	0.026598
GO:0006546	glycine catabolic process	biological_process	4	4	0	1577	6	22747	ENSG00000260643(AC092718.3),ENSG00000145020(AMT),ENSG00000284512(AC092718.8),ENSG00000178445(GLDC),	-	9.61615	0.000759526	0.026598
GO:0004908	interleukin-1 receptor activity	molecular_function	4	4	0	1577	7	22747	ENSG00000115594(IL1R1),ENSG00000115602(IL1RL1),ENSG00000115604(IL18R1),ENSG00000115598(IL1RL2),	-	8.24241	0.00123241	0.0356224
GO:1903288	positive regulation of potassium ion import across plasma membrane	biological_process	4	3	1	1577	7	22747	ENSG00000165238(WNK2),ENSG00000196632(WNK3),ENSG00000129244(ATP1B2),	ENSG00000126562(WNK4),	8.24241	0.00123241	0.0356224
GO:0002826	negative regulation of T-helper 1 type immune response	biological_process	4	2	2	1577	7	22747	ENSG00000077238(IL4R),ENSG00000115602(IL1RL1),	ENSG00000135077(HAVCR2),ENSG00000117586(TNFSF4),	8.24241	0.00123241	0.0356224
GO:0051458	corticotropin secretion	biological_process	5	3	2	1577	9	22747	ENSG00000147571(CRH),ENSG00000157017(GHRL),ENSG00000171388(APLN),	ENSG00000145708(CRHBP),ENSG00000240583(AQP1),	8.01346	0.000445547	0.0186945
GO:0004115	3',5'-cyclic-AMP phosphodiesterase activity	molecular_function	6	6	0	1577	12	22747	ENSG00000113448(PDE4D),ENSG00000152270(PDE3B),ENSG00000172572(PDE3A),ENSG00000186642(PDE2A),ENSG00000184588(PDE4B),ENSG00000171408(PDE7B),	-	7.21211	0.000241699	0.0125038
GO:0097052	L-kynurenine metabolic process	biological_process	4	1	3	1577	8	22747	ENSG00000115919(KYNU),	ENSG00000118514(ALDH8A1),ENSG00000117009(KMO),ENSG00000286112(AL441992.2),	7.21211	0.00189574	0.04808
GO:1903286	regulation of potassium ion import	biological_process	4	3	1	1577	8	22747	ENSG00000165238(WNK2),ENSG00000129244(ATP1B2),ENSG00000196632(WNK3),	ENSG00000126562(WNK4),	7.21211	0.00189574	0.04808
GO:0006072	glycerol-3-phosphate metabolic process	biological_process	5	4	1	1577	10	22747	ENSG00000198814(GK),ENSG00000186281(GPAT2),ENSG00000167588(GPD1),ENSG00000229894(GK3P),	ENSG00000152642(GPD1L),	7.21211	0.000673716	0.0250375
GO:0035744	T-helper 1 cell cytokine production	biological_process	4	3	1	1577	8	22747	ENSG00000125538(IL1B),ENSG00000115604(IL18R1),ENSG00000115594(IL1R1),	ENSG00000168811(IL12A),	7.21211	0.00189574	0.04808
GO:0019371	cyclooxygenase pathway	biological_process	5	4	1	1577	11	22747	ENSG00000073756(PTGS2),ENSG00000059377(TBXAS1),ENSG00000148344(PTGES),ENSG00000107317(PTGDS),	ENSG00000196139(AKR1C3),	6.55647	0.000984081	0.0308968
GO:0042487	regulation of odontogenesis of dentin-containing tooth	biological_process	5	2	3	1577	11	22747	ENSG00000064300(NGFR),ENSG00000125845(BMP2),	ENSG00000164761(TNFRSF11B),ENSG00000147655(RSPO2),ENSG00000154856(APCDD1),	6.55647	0.000984081	0.0308968
GO:0006569	tryptophan catabolic process	biological_process	5	3	2	1577	11	22747	ENSG00000115919(KYNU),ENSG00000162882(HAAO),ENSG00000153086(ACMSD),	ENSG00000117009(KMO),ENSG00000188676(IDO2),	6.55647	0.000984081	0.0308968
GO:0031232	extrinsic component of external side of plasma membrane	cellular_component	4	2	2	1577	9	22747	ENSG00000107611(CUBN),ENSG00000135919(SERPINE2),	ENSG00000105989(WNT2),ENSG00000091513(TF),	6.41077	0.00279177	0.0605215
GO:0043121	neurotrophin binding	molecular_function	4	4	0	1577	9	22747	ENSG00000140538(NTRK3),ENSG00000173805(HAP1),ENSG00000053108(FSTL4),ENSG00000064300(NGFR),	-	6.41077	0.00279177	0.0605215
GO:0030492	hemoglobin binding	molecular_function	4	0	4	1577	9	22747	-	ENSG00000213931(HBE1),ENSG00000257017(HP),ENSG00000223609(HBD),ENSG00000213934(HBG1),	6.41077	0.00279177	0.0605215
GO:0032308	positive regulation of prostaglandin secretion	biological_process	6	5	1	1577	14	22747	ENSG00000108984(MAP2K6),ENSG00000125538(IL1B),ENSG00000141655(TNFRSF11A),ENSG00000116711(PLA2G4A),ENSG00000148344(PTGES),	ENSG00000078401(EDN1),	6.18181	0.000497034	0.0201133
GO:0071281	cellular response to iron ion	biological_process	5	1	4	1577	12	22747	ENSG00000138449(SLC40A1),	ENSG00000100292(HMOX1),ENSG00000153162(BMP6),ENSG00000137203(TFAP2A),ENSG00000091513(TF),	6.01009	0.00139526	0.0387312
GO:0048149	behavioral response to ethanol	biological_process	5	2	3	1577	12	22747	ENSG00000175344(CHRNA7),ENSG00000149295(DRD2),	ENSG00000133958(UNC79),ENSG00000145708(CRHBP),ENSG00000123454(DBH),	6.01009	0.00139526	0.0387312
GO:0014061	regulation of norepinephrine secretion	biological_process	7	2	5	1577	17	22747	ENSG00000175344(CHRNA7),ENSG00000147571(CRH),	ENSG00000180914(OXTR),ENSG00000158445(KCNB1),ENSG00000150594(ADRA2A),ENSG00000169860(P2RY1),ENSG00000128271(ADORA2A),	5.93939	0.000247815	0.0127478
GO:0035813	regulation of renal sodium excretion	biological_process	9	3	6	1577	22	22747	ENSG00000144891(AGTR1),ENSG00000136160(EDNRB),ENSG00000149295(DRD2),	ENSG00000078401(EDN1),ENSG00000145244(CORIN),ENSG00000126895(AVPR2),ENSG00000128271(ADORA2A),ENSG00000169418(NPR1),ENSG00000134548(SPX),	5.90082	4.4844e-05	0.00385193
GO:0048739	cardiac muscle cell development	biological_process	4	1	3	1577	10	22747	ENSG00000112715(VEGFA),	ENSG00000170624(SGCD),ENSG00000133392(MYH11),ENSG00000133454(MYO18B),	5.76969	0.00396488	0.0747416
GO:0005344	oxygen carrier activity	molecular_function	6	1	5	1577	15	22747	ENSG00000161544(CYGB),	ENSG00000074706(IPCEF1),ENSG00000284931(AC104389.6),ENSG00000223609(HBD),ENSG00000213934(HBG1),ENSG00000213931(HBE1),	5.76969	0.00068822	0.0251656
GO:0035860	glial cell-derived neurotrophic factor receptor signaling pathway	biological_process	4	2	2	1577	10	22747	ENSG00000146013(GFRA3),ENSG00000130513(GDF15),	ENSG00000137573(SULF1),ENSG00000151892(GFRA1),	5.76969	0.00396488	0.0747416
GO:0042045	epithelial fluid transport	biological_process	4	2	2	1577	10	22747	ENSG00000001626(CFTR),ENSG00000136160(EDNRB),	ENSG00000240583(AQP1),ENSG00000078401(EDN1),	5.76969	0.00396488	0.0747416

## Sheet: Table SII
Table SII. List of the top 30 GO terms/KEGG pathways the dysregulated genes are enriched in.
pathway_ID	PATHWAY_DES	diff_gene_in_this_pathway	UP_GENES	DOWN_GENES	diff_gene_in_all_pathway	all_gene_in_this_pathway	all_gene_in_all_pathway	all_gene_list	gene_UP_list	gene_DOWN_list	rich_factor	P-value	Q value
hsa04610	Complement and coagulation cascades	20	11	9	628	85	9290	ENSG00000176919(C8G),ENSG00000112936(C7),ENSG00000205403(CFI),ENSG00000099937(SERPIND1),ENSG00000110799(VWF),ENSG00000160255(ITGB2),ENSG00000115718(PROC),ENSG00000039537(C6),ENSG00000197632(SERPINB2),ENSG00000106366(SERPINE1),ENSG00000197249(SERPINA1),ENSG00000120885(CLU),ENSG00000178726(THBD),ENSG00000117525(F3),ENSG00000125730(C3),ENSG00000100739(BDKRB1),ENSG00000243649(CFB),ENSG00000104368(PLA…	ENSG00000205403(CFI),ENSG00000099937(SERPIND1),ENSG00000160255(ITGB2),ENSG00000197632(SERPINB2),ENSG00000197249(SERPINA1),ENSG00000178726(THBD),ENSG00000125730(C3),ENSG00000100739(BDKRB1),ENSG00000104368(PLAT),ENSG00000166278(C2),ENSG00000188488(SERPINA5),	ENSG00000176919(C8G),ENSG00000112936(C7),ENSG00000110799(VWF),ENSG00000115718(PROC),ENSG00000039537(C6),ENSG00000106366(SERPINE1),ENSG00000120885(CLU),ENSG00000117525(F3),ENSG00000243649(CFB),	3.4807	1.81669e-06	0.000284312
hsa00360	Phenylalanine metabolism	4	1	3	628	17	9290	ENSG00000131471(AOC3),ENSG00000108602(ALDH3A1),ENSG00000131480(AOC2),ENSG00000132746(ALDH3B2),	ENSG00000131480(AOC2),	ENSG00000131471(AOC3),ENSG00000108602(ALDH3A1),ENSG00000132746(ALDH3B2),	3.4807	0.0132061	0.0810494
hsa00410	beta-Alanine metabolism	7	2	5	628	30	9290	ENSG00000183044(ABAT),ENSG00000131471(AOC3),ENSG00000108602(ALDH3A1),ENSG00000088826(SMOX),ENSG00000100024(UPB1),ENSG00000131480(AOC2),ENSG00000132746(ALDH3B2),	ENSG00000088826(SMOX),ENSG00000131480(AOC2),	ENSG00000183044(ABAT),ENSG00000131471(AOC3),ENSG00000108602(ALDH3A1),ENSG00000100024(UPB1),ENSG00000132746(ALDH3B2),	3.4517	0.00247651	0.0258383
hsa00350	Tyrosine metabolism	8	1	7	628	36	9290	ENSG00000123454(DBH),ENSG00000131471(AOC3),ENSG00000108602(ALDH3A1),ENSG00000131480(AOC2),ENSG00000132746(ALDH3B2),ENSG00000107165(TYRP1),ENSG00000172955(ADH6),ENSG00000284922(AP000812.4),	ENSG00000131480(AOC2),	ENSG00000123454(DBH),ENSG00000131471(AOC3),ENSG00000108602(ALDH3A1),ENSG00000132746(ALDH3B2),ENSG00000107165(TYRP1),ENSG00000172955(ADH6),ENSG00000284922(AP000812.4),	3.28733	0.00197648	0.0237938
hsa00380	Tryptophan metabolism	9	5	4	628	42	9290	ENSG00000140465(CYP1A1),ENSG00000153086(ACMSD),ENSG00000188676(IDO2),ENSG00000129167(TPH1),ENSG00000117009(KMO),ENSG00000286112(AL441992.2),ENSG00000118514(ALDH8A1),ENSG00000162882(HAAO),ENSG00000115919(KYNU),	ENSG00000140465(CYP1A1),ENSG00000153086(ACMSD),ENSG00000129167(TPH1),ENSG00000162882(HAAO),ENSG00000115919(KYNU),	ENSG00000188676(IDO2),ENSG00000117009(KMO),ENSG00000286112(AL441992.2),ENSG00000118514(ALDH8A1),	3.16993	0.00153766	0.0229185
hsa00590	Arachidonic acid metabolism	13	8	5	628	61	9290	ENSG00000213316(LTC4S),ENSG00000186115(CYP4F2),ENSG00000186529(CYP4F3),ENSG00000099998(GGT5),ENSG00000130649(CYP2E1),ENSG00000176153(GPX2),ENSG00000107317(PTGDS),ENSG00000059377(TBXAS1),ENSG00000196139(AKR1C3),ENSG00000073756(PTGS2),ENSG00000148344(PTGES),ENSG00000243708(PLA2G4B),ENSG00000116711(PLA2G4A),	ENSG00000186529(CYP4F3),ENSG00000099998(GGT5),ENSG00000107317(PTGDS),ENSG00000059377(TBXAS1),ENSG00000073756(PTGS2),ENSG00000148344(PTGES),ENSG00000243708(PLA2G4B),ENSG00000116711(PLA2G4A),	ENSG00000213316(LTC4S),ENSG00000186115(CYP4F2),ENSG00000130649(CYP2E1),ENSG00000176153(GPX2),ENSG00000196139(AKR1C3),	3.15261	0.000227888	0.00648444
hsa05323	Rheumatoid arthritis	19	16	3	628	93	9290	ENSG00000125538(IL1B),ENSG00000110944(IL23A),ENSG00000163735(CXCL5),ENSG00000107562(CXCL12),ENSG00000160255(ITGB2),ENSG00000196611(MMP1),ENSG00000102755(FLT1),ENSG00000141655(TNFRSF11A),ENSG00000154188(ANGPT1),ENSG00000163734(CXCL3),ENSG00000149968(MMP3),ENSG00000169429(CXCL8),ENSG00000124875(CXCL6),ENSG00000177606(JUN),ENSG00000147614(ATP6V0D2),ENSG00000143882(ATP6V1C2),ENSG00000163739(CXCL1),EN…	ENSG00000125538(IL1B),ENSG00000163735(CXCL5),ENSG00000107562(CXCL12),ENSG00000160255(ITGB2),ENSG00000196611(MMP1),ENSG00000141655(TNFRSF11A),ENSG00000163734(CXCL3),ENSG00000149968(MMP3),ENSG00000169429(CXCL8),ENSG00000124875(CXCL6),ENSG00000177606(JUN),ENSG00000147614(ATP6V0D2),ENSG00000143882(ATP6V1C2),ENSG00000163739(CXCL1),ENSG00000095752(IL11),ENSG00000112715(VEGFA),	ENSG00000110944(IL23A),ENSG00000102755(FLT1),ENSG00000154188(ANGPT1),	3.02222	2.37116e-05	0.00185543
hsa05410	Hypertrophic cardiomyopathy	18	4	14	628	90	9290	ENSG00000159251(ACTC1),ENSG00000075461(CACNG4),ENSG00000164171(ITGA2),ENSG00000151062(CACNA2D4),ENSG00000114854(TNNC1),ENSG00000139626(ITGB7),ENSG00000105855(ITGB8),ENSG00000196569(LAMA2),ENSG00000142408(CACNG8),ENSG00000175084(DES),ENSG00000118194(TNNT2),ENSG00000170624(SGCD),ENSG00000108823(SGCA),ENSG00000213949(ITGA1),ENSG00000140416(TPM1),ENSG00000137809(ITGA11),ENSG00000078401(EDN1),ENSG0000…	ENSG00000164171(ITGA2),ENSG00000151062(CACNA2D4),ENSG00000139626(ITGB7),ENSG00000196569(LAMA2),	ENSG00000159251(ACTC1),ENSG00000075461(CACNG4),ENSG00000114854(TNNC1),ENSG00000105855(ITGB8),ENSG00000142408(CACNG8),ENSG00000175084(DES),ENSG00000118194(TNNT2),ENSG00000170624(SGCD),ENSG00000108823(SGCA),ENSG00000213949(ITGA1),ENSG00000140416(TPM1),ENSG00000137809(ITGA11),ENSG00000078401(EDN1),ENSG00000160808(MYL3),	2.9586	4.90073e-05	0.00255655
hsa05144	Malaria	10	8	2	628	50	9290	ENSG00000125538(IL1B),ENSG00000239732(TLR9),ENSG00000019991(HGF),ENSG00000111796(KLRB1),ENSG00000160255(ITGB2),ENSG00000186340(THBS2),ENSG00000169429(CXCL8),ENSG00000115884(SDC1),ENSG00000168811(IL12A),ENSG00000135218(CD36),	ENSG00000125538(IL1B),ENSG00000019991(HGF),ENSG00000111796(KLRB1),ENSG00000160255(ITGB2),ENSG00000186340(THBS2),ENSG00000169429(CXCL8),ENSG00000115884(SDC1),ENSG00000135218(CD36),	ENSG00000239732(TLR9),ENSG00000168811(IL12A),	2.9586	0.00163202	0.0232192
hsa00072	Synthesis and degradation of ketone bodies	2	1	1	628	10	9290	ENSG00000112972(HMGCS1),ENSG00000146151(HMGCLL1),	ENSG00000146151(HMGCLL1),	ENSG00000112972(HMGCS1),	2.9586	0.062989	0.231948
hsa04913	Ovarian steroidogenesis	10	6	4	628	51	9290	ENSG00000177465(ACOT4),ENSG00000140465(CYP1A1),ENSG00000147465(STAR),ENSG00000153162(BMP6),ENSG00000196139(AKR1C3),ENSG00000173175(ADCY5),ENSG00000073756(PTGS2),ENSG00000243708(PLA2G4B),ENSG00000116711(PLA2G4A),ENSG00000135346(CGA),	ENSG00000140465(CYP1A1),ENSG00000147465(STAR),ENSG00000073756(PTGS2),ENSG00000243708(PLA2G4B),ENSG00000116711(PLA2G4A),ENSG00000135346(CGA),	ENSG00000177465(ACOT4),ENSG00000153162(BMP6),ENSG00000196139(AKR1C3),ENSG00000173175(ADCY5),	2.90059	0.00190893	0.0248957
hsa05134	Legionellosis	11	8	3	628	57	9290	ENSG00000125538(IL1B),ENSG00000143761(ARF1),ENSG00000160255(ITGB2),ENSG00000163734(CXCL3),ENSG00000169429(CXCL8),ENSG00000125730(C3),ENSG00000170458(CD14),ENSG00000079332(SAR1A),ENSG00000168811(IL12A),ENSG00000163739(CXCL1),ENSG00000187554(TLR5),	ENSG00000125538(IL1B),ENSG00000143761(ARF1),ENSG00000160255(ITGB2),ENSG00000163734(CXCL3),ENSG00000169429(CXCL8),ENSG00000125730(C3),ENSG00000170458(CD14),ENSG00000163739(CXCL1),	ENSG00000079332(SAR1A),ENSG00000168811(IL12A),ENSG00000187554(TLR5),	2.85479	0.00141788	0.0221899
hsa04350	TGF-beta signaling pathway	18	8	10	628	94	9290	ENSG00000183691(NOG),ENSG00000125845(BMP2),ENSG00000139269(INHBE),ENSG00000166923(GREM1),ENSG00000108854(SMURF2),ENSG00000134363(FST),ENSG00000125965(GDF5),ENSG00000112175(BMP5),ENSG00000095739(BAMBI),ENSG00000153162(BMP6),ENSG00000011465(DCN),ENSG00000120693(SMAD9),ENSG00000138696(BMPR1B),ENSG00000243709(LEFTY1),ENSG00000180875(GREM2),ENSG00000117318(ID3),ENSG00000172201(ID4),ENSG00000125968(ID1…	ENSG00000125845(BMP2),ENSG00000166923(GREM1),ENSG00000112175(BMP5),ENSG00000120693(SMAD9),ENSG00000180875(GREM2),ENSG00000117318(ID3),ENSG00000172201(ID4),ENSG00000125968(ID1),	ENSG00000183691(NOG),ENSG00000139269(INHBE),ENSG00000108854(SMURF2),ENSG00000134363(FST),ENSG00000125965(GDF5),ENSG00000095739(BAMBI),ENSG00000153162(BMP6),ENSG00000011465(DCN),ENSG00000138696(BMPR1B),ENSG00000243709(LEFTY1),	2.8327	8.65631e-05	0.00338678
hsa05143	African trypanosomiasis	7	3	4	628	37	9290	ENSG00000125538(IL1B),ENSG00000239732(TLR9),ENSG00000188676(IDO2),ENSG00000118137(APOA1),ENSG00000126583(PRKCG),ENSG00000168811(IL12A),ENSG00000137841(PLCB2),	ENSG00000125538(IL1B),ENSG00000126583(PRKCG),ENSG00000137841(PLCB2),	ENSG00000239732(TLR9),ENSG00000188676(IDO2),ENSG00000118137(APOA1),ENSG00000168811(IL12A),	2.79867	0.00877693	0.0610484
hsa05414	Dilated cardiomyopathy	18	4	14	628	96	9290	ENSG00000159251(ACTC1),ENSG00000075461(CACNG4),ENSG00000164171(ITGA2),ENSG00000151062(CACNA2D4),ENSG00000114854(TNNC1),ENSG00000139626(ITGB7),ENSG00000105855(ITGB8),ENSG00000196569(LAMA2),ENSG00000142408(CACNG8),ENSG00000175084(DES),ENSG00000118194(TNNT2),ENSG00000170624(SGCD),ENSG00000108823(SGCA),ENSG00000213949(ITGA1),ENSG00000140416(TPM1),ENSG00000173175(ADCY5),ENSG00000137809(ITGA11),ENSG000…	ENSG00000164171(ITGA2),ENSG00000151062(CACNA2D4),ENSG00000139626(ITGB7),ENSG00000196569(LAMA2),	ENSG00000159251(ACTC1),ENSG00000075461(CACNG4),ENSG00000114854(TNNC1),ENSG00000105855(ITGB8),ENSG00000142408(CACNG8),ENSG00000175084(DES),ENSG00000118194(TNNT2),ENSG00000170624(SGCD),ENSG00000108823(SGCA),ENSG00000213949(ITGA1),ENSG00000140416(TPM1),ENSG00000173175(ADCY5),ENSG00000137809(ITGA11),ENSG00000160808(MYL3),	2.77369	0.000113566	0.00394957
hsa00730	Thiamine metabolism	3	0	3	628	16	9290	ENSG00000162551(ALPL),ENSG00000163283(ALPP),ENSG00000196511(TPK1),	-	ENSG00000162551(ALPL),ENSG00000163283(ALPP),ENSG00000196511(TPK1),	2.77369	0.0492917	0.203004
hsa00340	Histidine metabolism	4	0	4	628	22	9290	ENSG00000108602(ALDH3A1),ENSG00000159650(UROC1),ENSG00000084110(HAL),ENSG00000132746(ALDH3B2),	-	ENSG00000108602(ALDH3A1),ENSG00000159650(UROC1),ENSG00000084110(HAL),ENSG00000132746(ALDH3B2),	2.68964	0.0364525	0.172873
hsa04512	ECM-receptor interaction	16	11	5	628	88	9290	ENSG00000164171(ITGA2),ENSG00000091128(LAMB4),ENSG00000110799(VWF),ENSG00000139626(ITGB7),ENSG00000105855(ITGB8),ENSG00000196569(LAMA2),ENSG00000136457(CHAD),ENSG00000118785(SPP1),ENSG00000196878(LAMB3),ENSG00000186340(THBS2),ENSG00000213949(ITGA1),ENSG00000185245(GP1BA),ENSG00000137809(ITGA11),ENSG00000115884(SDC1),ENSG00000197565(COL4A6),ENSG00000135218(CD36),	ENSG00000164171(ITGA2),ENSG00000091128(LAMB4),ENSG00000139626(ITGB7),ENSG00000196569(LAMA2),ENSG00000136457(CHAD),ENSG00000196878(LAMB3),ENSG00000186340(THBS2),ENSG00000185245(GP1BA),ENSG00000115884(SDC1),ENSG00000197565(COL4A6),ENSG00000135218(CD36),	ENSG00000110799(VWF),ENSG00000105855(ITGB8),ENSG00000118785(SPP1),ENSG00000213949(ITGA1),ENSG00000137809(ITGA11),	2.68964	0.000353366	0.00790026
hsa00650	Butanoate metabolism	5	2	3	628	28	9290	ENSG00000183044(ABAT),ENSG00000005187(ACSM3),ENSG00000215009(ACSM4),ENSG00000112972(HMGCS1),ENSG00000146151(HMGCLL1),	ENSG00000005187(ACSM3),ENSG00000146151(HMGCLL1),	ENSG00000183044(ABAT),ENSG00000215009(ACSM4),ENSG00000112972(HMGCS1),	2.64161	0.0264671	0.145337
hsa05146	Amoebiasis	18	15	3	628	102	9290	ENSG00000125538(IL1B),ENSG00000176919(C8G),ENSG00000091128(LAMB4),ENSG00000196569(LAMA2),ENSG00000160255(ITGB2),ENSG00000057149(SERPINB3),ENSG00000158473(CD1D),ENSG00000115594(IL1R1),ENSG00000196878(LAMB3),ENSG00000163734(CXCL3),ENSG00000169429(CXCL8),ENSG00000126583(PRKCG),ENSG00000197565(COL4A6),ENSG00000156049(GNA14),ENSG00000170458(CD14),ENSG00000168811(IL12A),ENSG00000163739(CXCL1),ENSG00000…	ENSG00000125538(IL1B),ENSG00000091128(LAMB4),ENSG00000196569(LAMA2),ENSG00000160255(ITGB2),ENSG00000057149(SERPINB3),ENSG00000158473(CD1D),ENSG00000115594(IL1R1),ENSG00000196878(LAMB3),ENSG00000163734(CXCL3),ENSG00000169429(CXCL8),ENSG00000126583(PRKCG),ENSG00000197565(COL4A6),ENSG00000170458(CD14),ENSG00000163739(CXCL1),ENSG00000137841(PLCB2),	ENSG00000176919(C8G),ENSG00000156049(GNA14),ENSG00000168811(IL12A),	2.61053	0.000244535	0.00637829
hsa05032	Morphine addiction	16	12	4	628	91	9290	ENSG00000172572(PDE3A),ENSG00000176533(GNG7),ENSG00000151834(GABRA2),ENSG00000163288(GABRB1),ENSG00000186642(PDE2A),ENSG00000113448(PDE4D),ENSG00000184588(PDE4B),ENSG00000127920(GNG11),ENSG00000184845(DRD1),ENSG00000173175(ADCY5),ENSG00000136928(GABBR2),ENSG00000126583(PRKCG),ENSG00000112541(PDE10A),ENSG00000152270(PDE3B),ENSG00000171408(PDE7B),ENSG00000157542(KCNJ6),	ENSG00000172572(PDE3A),ENSG00000151834(GABRA2),ENSG00000163288(GABRB1),ENSG00000186642(PDE2A),ENSG00000113448(PDE4D),ENSG00000184588(PDE4B),ENSG00000127920(GNG11),ENSG00000136928(GABBR2),ENSG00000126583(PRKCG),ENSG00000112541(PDE10A),ENSG00000152270(PDE3B),ENSG00000171408(PDE7B),	ENSG00000176533(GNG7),ENSG00000184845(DRD1),ENSG00000173175(ADCY5),ENSG00000157542(KCNJ6),	2.60097	0.000516408	0.0107757
hsa04924	Renin secretion	12	5	7	628	69	9290	ENSG00000138669(PRKG2),ENSG00000169418(NPR1),ENSG00000172572(PDE3A),ENSG00000137975(CLCA2),ENSG00000144891(AGTR1),ENSG00000152402(GUCY1A2),ENSG00000173175(ADCY5),ENSG00000240583(AQP1),ENSG00000078401(EDN1),ENSG00000152270(PDE3B),ENSG00000171522(PTGER4),ENSG00000137841(PLCB2),	ENSG00000138669(PRKG2),ENSG00000172572(PDE3A),ENSG00000144891(AGTR1),ENSG00000152270(PDE3B),ENSG00000137841(PLCB2),	ENSG00000169418(NPR1),ENSG00000137975(CLCA2),ENSG00000152402(GUCY1A2),ENSG00000173175(ADCY5),ENSG00000240583(AQP1),ENSG00000078401(EDN1),ENSG00000171522(PTGER4),	2.57269	0.00236109	0.0254835
hsa04964	Proximal tubule bicarbonate reclamation	4	1	3	628	23	9290	ENSG00000018625(ATP1A2),ENSG00000115419(GLS),ENSG00000129244(ATP1B2),ENSG00000240583(AQP1),	ENSG00000129244(ATP1B2),	ENSG00000018625(ATP1A2),ENSG00000115419(GLS),ENSG00000240583(AQP1),	2.57269	0.0431148	0.195579
hsa04060	Cytokine-cytokine receptor interaction	51	32	19	628	295	9290	ENSG00000125538(IL1B),ENSG00000110944(IL23A),ENSG00000163735(CXCL5),ENSG00000186891(TNFRSF18),ENSG00000146072(TNFRSF21),ENSG00000197919(IFNA1),ENSG00000107562(CXCL12),ENSG00000115604(IL18R1),ENSG00000125845(BMP2),ENSG00000139269(INHBE),ENSG00000077238(IL4R),ENSG00000158813(EDA),ENSG00000181374(CCL13),ENSG00000157368(IL34),ENSG00000162892(IL24),ENSG00000185291(IL3RA),ENSG00000125965(GDF5),ENSG0000…	ENSG00000125538(IL1B),ENSG00000163735(CXCL5),ENSG00000186891(TNFRSF18),ENSG00000146072(TNFRSF21),ENSG00000107562(CXCL12),ENSG00000115604(IL18R1),ENSG00000125845(BMP2),ENSG00000077238(IL4R),ENSG00000181374(CCL13),ENSG00000162892(IL24),ENSG00000115602(IL1RL1),ENSG00000141655(TNFRSF11A),ENSG00000115594(IL1R1),ENSG00000112175(BMP5),ENSG00000115598(IL1RL2),ENSG00000108700(CCL8),ENSG00000169245(CXCL10)…	ENSG00000110944(IL23A),ENSG00000197919(IFNA1),ENSG00000139269(INHBE),ENSG00000158813(EDA),ENSG00000157368(IL34),ENSG00000185291(IL3RA),ENSG00000125965(GDF5),ENSG00000168685(IL7R),ENSG00000266524(GDF10),ENSG00000138379(MSTN),ENSG00000117586(TNFSF4),ENSG00000144476(ACKR3),ENSG00000164761(TNFRSF11B),ENSG00000104432(IL7),ENSG00000153162(BMP6),ENSG00000138696(BMPR1B),ENSG00000123999(INHA),ENSG00000168…	2.55743	7.58094e-09	2.37284e-06
hsa04929	GnRH secretion	11	6	5	628	64	9290	ENSG00000118785(SPP1),ENSG00000080709(KCNN2),ENSG00000104783(KCNN4),ENSG00000170498(KISS1),ENSG00000136928(GABBR2),ENSG00000126583(PRKCG),ENSG00000100346(CACNA1I),ENSG00000143630(HCN3),ENSG00000135346(CGA),ENSG00000157542(KCNJ6),ENSG00000137841(PLCB2),	ENSG00000104783(KCNN4),ENSG00000136928(GABBR2),ENSG00000126583(PRKCG),ENSG00000100346(CACNA1I),ENSG00000135346(CGA),ENSG00000137841(PLCB2),	ENSG00000118785(SPP1),ENSG00000080709(KCNN2),ENSG00000170498(KISS1),ENSG00000143630(HCN3),ENSG00000157542(KCNJ6),	2.54255	0.00370227	0.0340827
hsa05133	Pertussis	13	11	2	628	76	9290	ENSG00000125538(IL1B),ENSG00000110944(IL23A),ENSG00000163735(CXCL5),ENSG00000160255(ITGB2),ENSG00000156711(MAPK13),ENSG00000169429(CXCL8),ENSG00000124875(CXCL6),ENSG00000177606(JUN),ENSG00000125730(C3),ENSG00000170458(CD14),ENSG00000166278(C2),ENSG00000168811(IL12A),ENSG00000162711(NLRP3),	ENSG00000125538(IL1B),ENSG00000163735(CXCL5),ENSG00000160255(ITGB2),ENSG00000156711(MAPK13),ENSG00000169429(CXCL8),ENSG00000124875(CXCL6),ENSG00000177606(JUN),ENSG00000125730(C3),ENSG00000170458(CD14),ENSG00000166278(C2),ENSG00000162711(NLRP3),	ENSG00000110944(IL23A),ENSG00000168811(IL12A),	2.53038	0.00193716	0.0242532
hsa05204	Chemical carcinogenesis	13	7	6	628	83	9290	ENSG00000140465(CYP1A1),ENSG00000255974(CYP2A6),ENSG00000108602(ALDH3A1),ENSG00000130649(CYP2E1),ENSG00000213648(SULT1A4),ENSG00000286112(AL441992.2),ENSG00000160870(CYP3A7),ENSG00000073756(PTGS2),ENSG00000117594(HSD11B1),ENSG00000132746(ALDH3B2),ENSG00000172955(ADH6),ENSG00000175344(CHRNA7),ENSG00000243955(GSTA1),	ENSG00000140465(CYP1A1),ENSG00000213648(SULT1A4),ENSG00000160870(CYP3A7),ENSG00000073756(PTGS2),ENSG00000117594(HSD11B1),ENSG00000175344(CHRNA7),ENSG00000243955(GSTA1),	ENSG00000255974(CYP2A6),ENSG00000108602(ALDH3A1),ENSG00000130649(CYP2E1),ENSG00000286112(AL441992.2),ENSG00000132746(ALDH3B2),ENSG00000172955(ADH6),	2.31697	0.00430563	0.0374351
hsa05412	Arrhythmogenic right ventricular cardiomyopathy	12	4	8	628	77	9290	ENSG00000075461(CACNG4),ENSG00000164171(ITGA2),ENSG00000151062(CACNA2D4),ENSG00000139626(ITGB7),ENSG00000105855(ITGB8),ENSG00000196569(LAMA2),ENSG00000142408(CACNG8),ENSG00000175084(DES),ENSG00000170624(SGCD),ENSG00000108823(SGCA),ENSG00000213949(ITGA1),ENSG00000137809(ITGA11),	ENSG00000164171(ITGA2),ENSG00000151062(CACNA2D4),ENSG00000139626(ITGB7),ENSG00000196569(LAMA2),	ENSG00000075461(CACNG4),ENSG00000105855(ITGB8),ENSG00000142408(CACNG8),ENSG00000175084(DES),ENSG00000170624(SGCD),ENSG00000108823(SGCA),ENSG00000213949(ITGA1),ENSG00000137809(ITGA11),	2.3054	0.00600036	0.0481567
hsa02010	ABC transporters	7	2	5	628	45	9290	ENSG00000154263(ABCA10),ENSG00000198691(ABCA4),ENSG00000160179(ABCG1),ENSG00000069431(ABCC9),ENSG00000001626(CFTR),ENSG00000154265(ABCA5),ENSG00000005471(ABCB4),	ENSG00000160179(ABCG1),ENSG00000001626(CFTR),	ENSG00000154263(ABCA10),ENSG00000198691(ABCA4),ENSG00000069431(ABCC9),ENSG00000154265(ABCA5),ENSG00000005471(ABCB4),	2.30113	0.0263368	0.147204
hsa04974	Protein digestion and absorption	16	9	7	628	103	9290	ENSG00000144810(COL8A1),ENSG00000163751(CPA3),ENSG00000115474(KCNJ13),ENSG00000018625(ATP1A2),ENSG00000175538(KCNE3),ENSG00000104783(KCNN4),ENSG00000114270(COL7A1),ENSG00000049540(ELN),ENSG00000215704(CELA2B),ENSG00000129244(ATP1B2),ENSG00000215018(COL28A1),ENSG00000197565(COL4A6),ENSG00000197467(COL13A1),ENSG00000065618(COL17A1),ENSG00000124749(COL21A1),ENSG00000158516(CPA2),	ENSG00000175538(KCNE3),ENSG00000104783(KCNN4),ENSG00000114270(COL7A1),ENSG00000129244(ATP1B2),ENSG00000197565(COL4A6),ENSG00000197467(COL13A1),ENSG00000065618(COL17A1),ENSG00000124749(COL21A1),ENSG00000158516(CPA2),	ENSG00000144810(COL8A1),ENSG00000163751(CPA3),ENSG00000115474(KCNJ13),ENSG00000018625(ATP1A2),ENSG00000049540(ELN),ENSG00000215704(CELA2B),ENSG00000215018(COL28A1),	2.29794	0.00198514	0.0230129
